# Supplementary material for: TNFα Enhances Tamoxifen Sensitivity through Dissociation of ERα-p53-NCOR1 Complexes in ERα-Positive Breast Cancer
Source: MDPI journal article supplement (doi:10.3390/cancers13112601), 2021-05-26
Supplement: s1 [file s1]

# Supplementary Materials: TNF $\alpha$ Enhances Tamoxifen Sensitivity through Dissociation of ER $\alpha$ -p53-NCOR1 Complexes in ER $\alpha$ -Positive Breast Cancer

Hyunhee Kim, Seung-Ho Park, Jangho Lee, Gi-Jun Sung, Ji-Hye Song, Sungmin Kwak, Ji-Hoon Jeong, Min-Jeong Kong, Jin-Taek Hwang, Hyo-Kyoung Choi and Kyung-Chul Choi

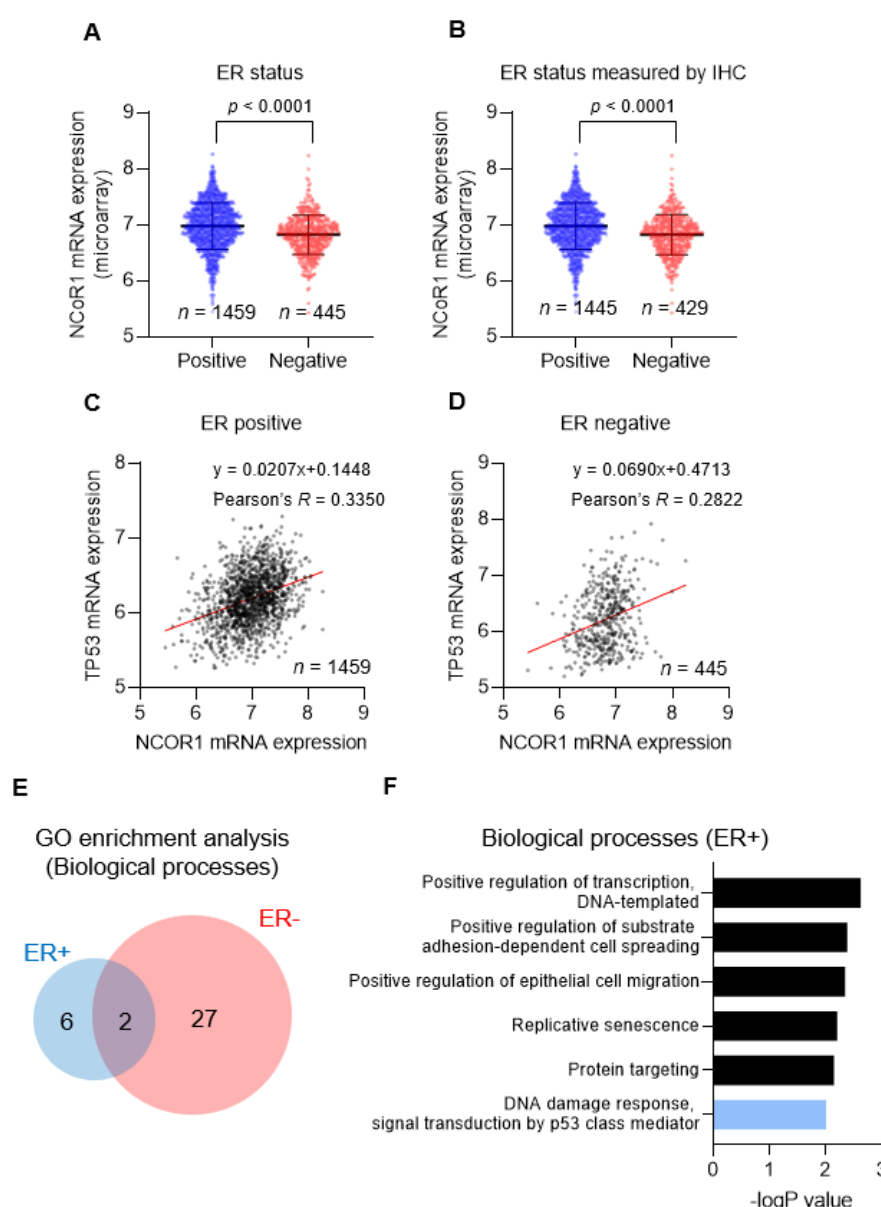

**Figure S1.** Analysis of the association between NCOR1 and P53 in ER+ breast cancer. The association between NCOR1 and P53 signaling in ER+ breast cancer. The transcriptome data of breast cancer cohort from The Cancer Genome Atlas (TCGA) ( $n = 1,904$ ) was analyzed. (A, B) *Ncor1* mRNA levels in ER positive or ER negative breast cancer. ER status was measured by RNA-Seq (A) or IHC (B). (C, D) The correlation between *Ncor1* and *Tp53* mRNA expressions in ER positive (C) or ER negative breast cancer (D). Venn diagram for the biological processes enriched in ER+ and/or ER- breast tumors. (E) The biological processes enriched only in ER+ breast tumor.

**Table S1.** Antibodies used for WB and ChIP assays.

| Antibodies              | Vendor<br>Cat no.                       | Local                | Country | Titer             | Usage          |
|-------------------------|-----------------------------------------|----------------------|---------|-------------------|----------------|
| $\alpha$ H3K9ac         | Merck<br>06-942                         | Darmstadt            | Germany | (1:100)           | W. B<br>(ChIP) |
| $\alpha$ H3K4me3        | Merck<br>05-1339                        | Darmstadt            | Germany | (1:100)           |                |
| $\alpha$ H3K9me3        | Merck<br>05-1250                        | Darmstadt            | Germany | (1:100)           |                |
| $\alpha$ ER $\alpha$    | Santa Cruz Biotechnol-<br>ogy<br>SC-543 | Dallas, Texas        | USA     | 1:1000<br>(1:100) |                |
| $\alpha$ p53            | Santa Cruz Biotechnol-<br>ogy<br>SC-126 | Dallas, Texas        | USA     | 1:1000<br>(1:100) |                |
| $\alpha$ p-p53          | Abcam<br>ab134190                       | Cambridge            | UK      | 1:1000            | W.B            |
| $\alpha$ NCoR           | ATGEN                                   | Seongnam, Gyeonggido | Korea   | 1:1000            |                |
| $\alpha$ p-NCoR         | ATGEN                                   | Seongnam, Gyeonggido | Korea   | 1:1000            |                |
| PARP-1                  | Cell signaling<br>9542S                 | Danvers, MA          | USA     | 1:1000            |                |
| Bax                     | Cell signaling<br>5023S                 | Danvers, MA          | USA     | 1:1000            |                |
| Bcl-2                   | Santa Cruz Biotechnol-<br>ogy<br>SC-492 | Dallas, Texas        | USA     | 1:1000            |                |
| $\alpha$ $\beta$ -Actin | Sigma-Aldrich<br>A5441                  | Saint Louis, MO      | USA     | 1:10000           |                |

Abbreviation:  $\alpha$ H3K9ac, anti-H3K9 acetylation;  $\alpha$ H3K4me3, anti-H3K4 trimethylation;  $\alpha$ H3K9me3, anti-H3K9 trimethylation;  $\alpha$ ER $\alpha$ , anti-Estrogen Receptor  $\alpha$ ;  $\alpha$ p53, anti-p53;  $\alpha$ p-p53, anti-phospho-p53;  $\alpha$ NCoR, anti-Nuclear receptor co-repressor;  $\alpha$ -PARP-1, anti-PARP-1;  $\alpha$ Bax, anti-Bax  $\alpha$ Bcl-2, anti-Bcl-2;  $\alpha$  $\beta$ -Actin, anti-beta Actin; W.B, Western blotting; ChIP, Chromatin immunoprecipitation.

**Table S2.** Primers used for qRT-PCR and ChIP assays.

| Primer List   |         |                                 |                        |
|---------------|---------|---------------------------------|------------------------|
| NCoR1         | Forward | 5' ACACCGCAGTATTGTCCAAAT 3'     | qRT-PCR<br>for human   |
|               | Reverse | 5' CACCTGGTTTGTCTTGATGTTCT 3'   |                        |
| GAPDH         | Forward | 5' TGATGACATCAAGAAGGTGGTGAAG 3' |                        |
|               | Reverse | 5' TCCTTGGAGGCCATGTAGGCCAT 3'   |                        |
| p21 pro-moter | Forward | 5' GTAAATCCTTGCCTGCCAGAG 3'     | qPCR for<br>ChIP assay |
|               | Reverse | 5' GCGCTGGACACATTTCCCCA 3'      |                        |

Abbreviation: NCoR1, Nuclear receptor co-repressor1; GAPDH, glyceraldehyde-3-phosphate dehydrogenase; p21, cyclin-dependent kinase inhibitor 1; ChIP assay, chromatin immunoprecipitation assay.

**Table S3.** *NCOR1* shRNA sequences for knockdown system.

| shRNA sequences list |                                                                      |
|----------------------|----------------------------------------------------------------------|
| <i>shNCoR1</i> #1    | 5' CCGGGCCACAGATGATGAAGAAATCTCGAGATTCTT<br>CATCATCTGTGGGCTTTTG 3'    |
| <i>shNCoR1</i> #2    | 5' CCGGGCCATCAAACACAATGTCAAACCTCGAGTTTGACA<br>TTGTGTTTGATGGCTTTTG 3' |

Abbreviation: NCoR1, Nuclear receptor co-repressor1.
