# Supplementary figures and images for: TNFα Enhances Tamoxifen Sensitivity through Dissociation of ERα-p53-NCOR1 Complexes in ERα-Positive Breast Cancer
Source: MDPI journal article supplement (doi:10.3390/cancers13112601), 2021-05-26

Figure 1.

A

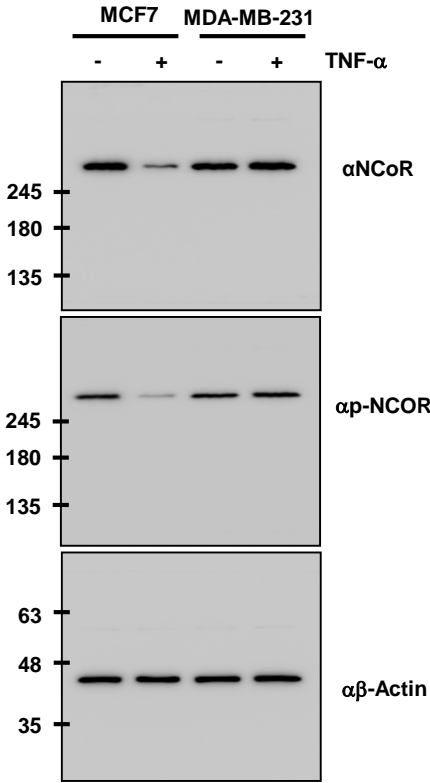

B

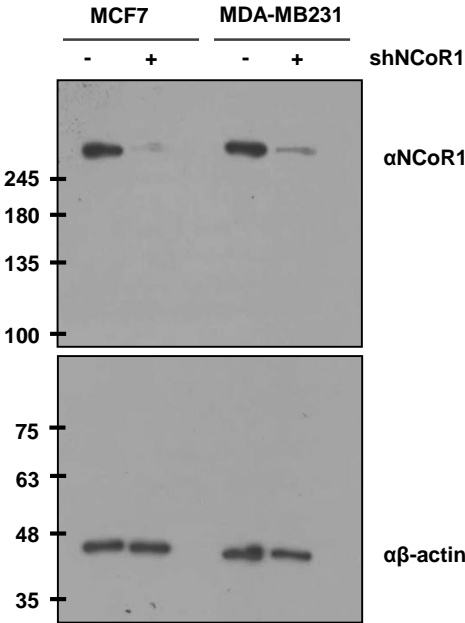

Figure 3.

A

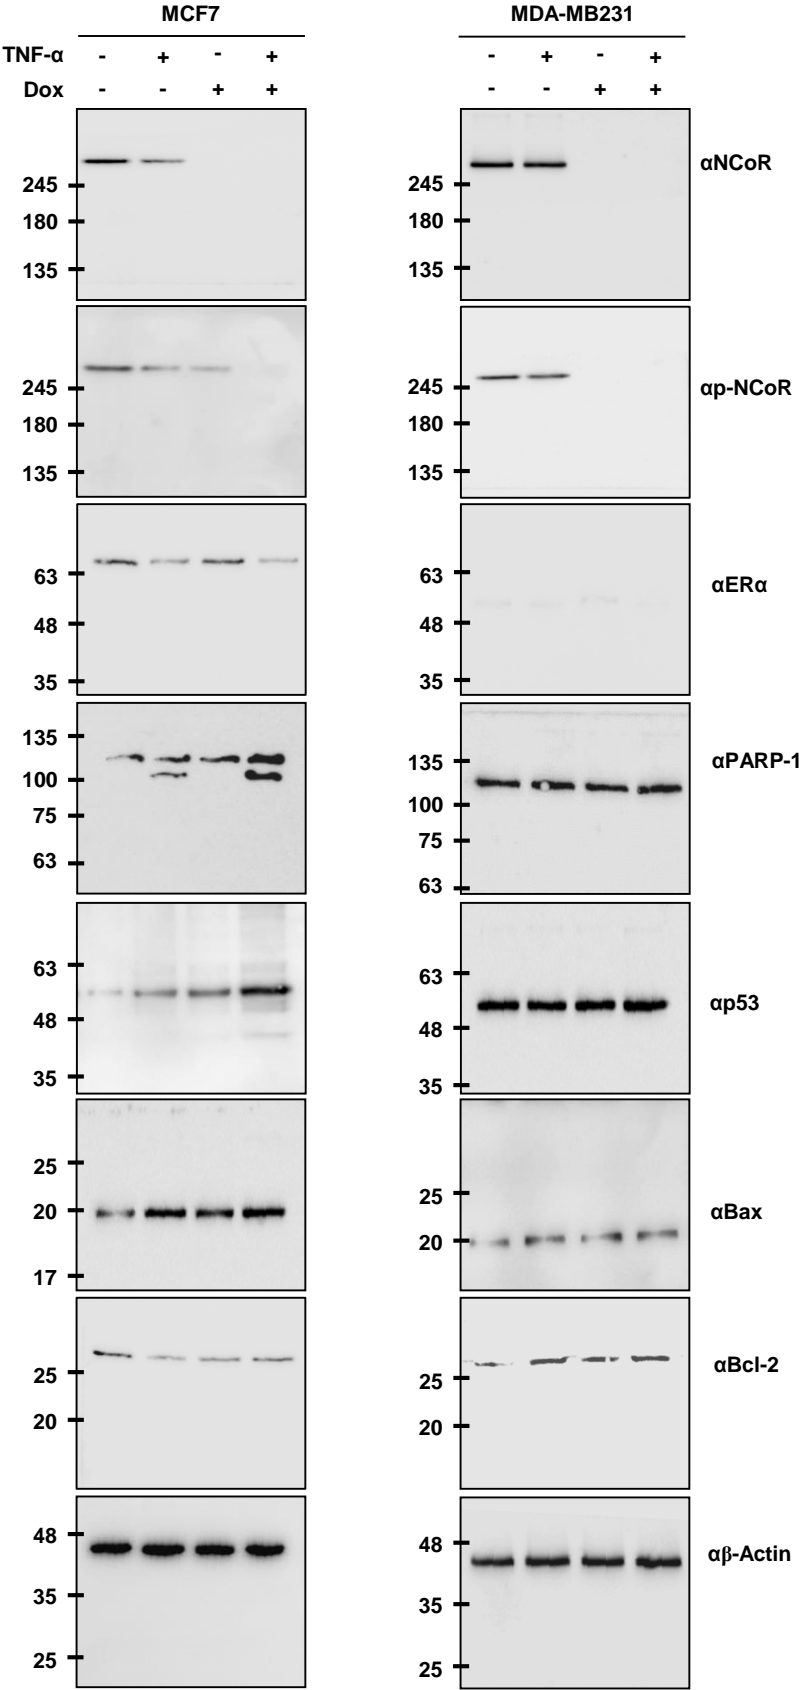

Figure 3.

B

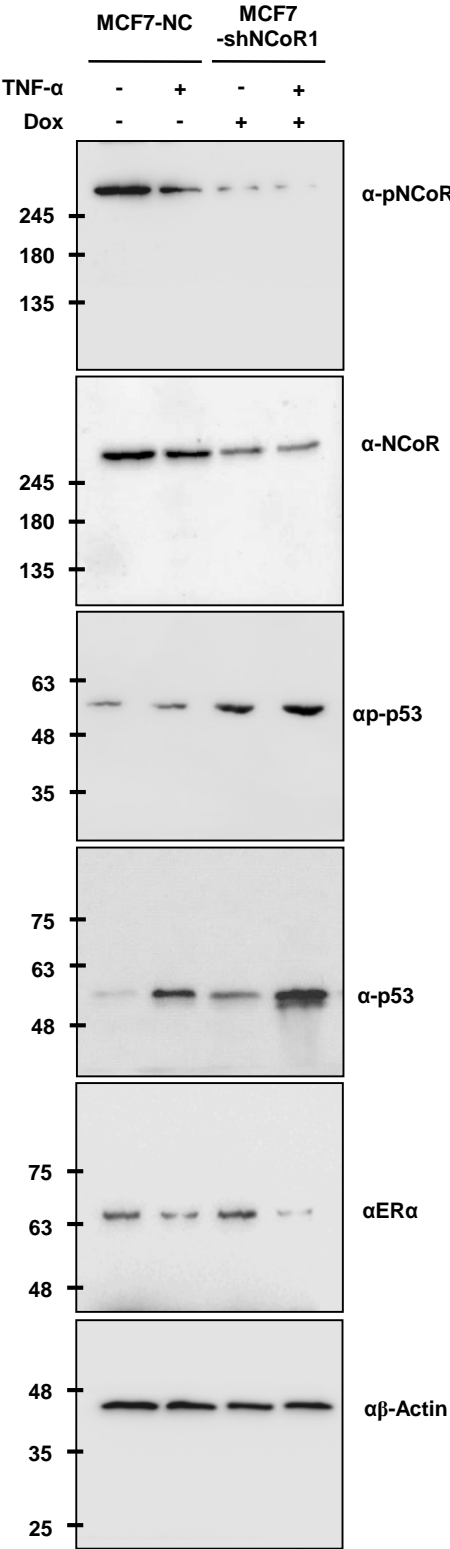

Figure 4.

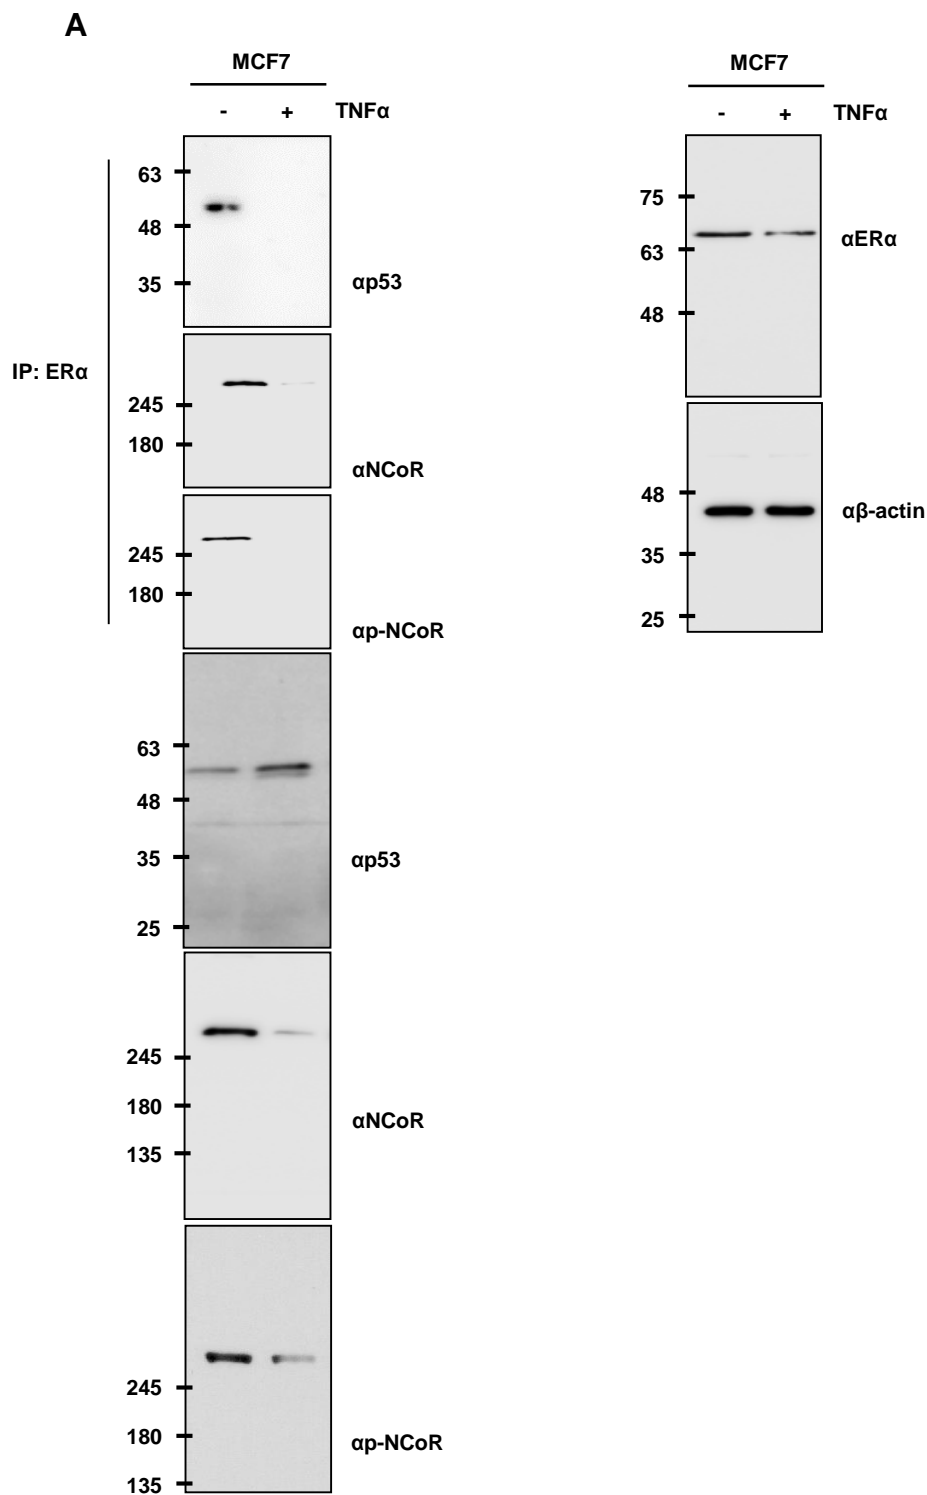

Supplement: s1 [file s1]
